## Real-time tractography-assisted neuronavigation for TMS

Dogu Baran Aydogan<sup>1,2,3</sup>, Victor H. Souza<sup>2,3,4</sup>, Renan H. Matsuda<sup>5,2</sup>,  
Pantelis Lioumis<sup>2,3,6</sup>, Risto J. Ilmoniemi<sup>2</sup>

<sup>1</sup> *A.I. Virtanen Institute for Molecular Sciences,  
University of Eastern Finland, Kuopio, Finland*

<sup>2</sup> *Department of Neuroscience and Biomedical Engineering,  
Aalto University School of Science, Espoo, Finland*

<sup>3</sup> *Aalto NeuroImaging,  
Aalto University School of Science, Espoo, Finland*

<sup>4</sup> *Graduate Program in Rehabilitation Sciences and Functional Physical Performance,  
School of Physiotherapy, Federal University of Juiz de Fora, Juiz de Fora, Brazil*

<sup>5</sup> *Department of Physics, School of Philosophy, Science and Letters at Ribeirão Preto,  
University of São Paulo, Ribeirão Preto, Brazil*

<sup>6</sup> *BioMag Laboratory, HUS Medical Imaging Center, University of Helsinki,  
Helsinki University Hospital and Aalto University, Helsinki, Finland*

## 1 **Abstract**

2 *Background:* State-of-the-art navigated transcranial magnetic stimulation (nTMS)  
3 systems can display the TMS coil position relative to the structural magnetic resonance  
4 image (MRI) of the subject's brain and calculate the induced electric field. However,  
5 the local effect of TMS propagates via the white-matter network to different areas of the  
6 brain, and currently there is no commercial or research neuronavigation system that can  
7 highlight in real time the brain's structural connections during TMS.

8 *Objective:* To develop a real-time tractography-assisted TMS neuronavigation system and  
9 investigate its feasibility.

10 *Method:* We propose a modular framework that seamlessly integrates offline (preparatory)  
11 analysis of diffusion MRI data with online (real-time) tractography. For tractography and  
12 neuronavigation we combine our custom software Trekker and InVesalius, respectively. We  
13 evaluate the feasibility of our system by comparing online and offline tractography results  
14 in terms of streamline count and their overlap.

15 *Results:* A real-time tractography-assisted TMS neuronavigation system is developed. Key  
16 features include the application of state-of-the-art tractography practices, the ability to  
17 tune tractography parameters on the fly, and the display of thousands of new streamlines  
18 every few seconds using a novel uncertainty visualization technique. We demonstrate in a  
19 video the feasibility and quantitatively show the agreement with offline filtered streamlines.

20 *Conclusion:* Real-time tractography-assisted TMS neuronavigation is feasible. With our  
21 system, it is possible to target specific brain regions based on their structural connectivity,  
22 and to aim for the fiber tracts that make up the brain's networks.

23 **Keywords:** brain stimulation, TMS, neuronavigation, diffusion MRI, connectivity,  
24 tractography

## 25 1. Introduction

26 Transcranial magnetic stimulation (TMS) is a non-invasive brain stimulation technique  
27 approved in many countries, for treating major depression disorder (MDD) ([Fitzgerald](#)  
28 [et al., 2009](#)), obsessive-compulsive disorder (OCD) ([Pelissolo et al., 2016](#)), and for  
29 performing motor and speech cortical mapping as part of presurgical evaluation  
30 ([Lefaucheur and Picht, 2016](#); [Krieg et al., 2017](#)). The navigated TMS (nTMS) approach is  
31 also widely used to investigate brain functions by evoking motor or behavioral responses or  
32 by interrupting task-related processes ([Grosprêtre et al., 2016](#); [Di Lazzaro and Rothwell,](#)  
33 [2014](#); [Lefaucheur et al., 2014](#); [Tremblay et al., 2019](#)). However, defining optimal targets  
34 for TMS remains a challenging task, which is mostly done based on brain’s morphology,  
35 using coordinates from atlases, or pre-defined locations from functional neuroimages ([Cash](#)  
36 [et al., 2021](#)).

37 With a stimulation coil placed on the scalp, TMS induces a brief electric field (E-field)  
38 that activates neurons in a limited brain region (approx.  $1 \text{ cm}^2$ ) ([Terao and Ugawa,](#)  
39 [2002](#)). The localized activation, however, propagates to different areas via the white-  
40 matter network ([Van Essen, 2013](#)). Knowing which networks or connections of the brain  
41 are affected by TMS is important because structural connectivity of the brain plays a role  
42 in understanding and treating many brain disorders including MDD ([Korgaonkar et al.,](#)  
43 [2014](#)), Alzheimer’s disease ([Lo et al., 2010](#)), multiple sclerosis ([Llufriu et al., 2017](#)) and  
44 stroke ([Yamada et al., 2004](#)). Connections in the brain’s white matter can be detected  
45 non-invasively and in vivo with fiber tracking, *i.e.*, tractography, using diffusion magnetic

46 resonance imaging (dMRI) (Shi and Toga, 2017). During the last years, research based  
47 on tractography has contributed substantially to elucidating the circuitry of the human  
48 brain (Wandell, 2016). Tractography can be performed on the whole brain, providing the  
49 structural connectome to study its network properties (Rubinov and Sporns, 2010), or on  
50 selected, *i.e.*, seed, regions in the brain.

51 State-of-the-art nTMS systems provide real-time updates of the coil position and the  
52 estimated induced E-field overlaid on the individual's structural T1-weighted MRI  
53 (Ruohonen and Karhu, 2010; Hannula and Ilmoniemi, 2017). The addition of real-time  
54 tractography information to the already existing nTMS would be highly valuable by  
55 making it possible to aim for fiber tracts or to target regions that are remotely connected  
56 to the area under the coil. However, introducing real-time structural connectivity  
57 estimation to existing nTMS systems is challenging. This is mainly due to the inherent  
58 limitations involved with the accuracy of tractography, which have been increasingly  
59 pointed out in recent years by validation studies (Thomas et al., 2014; Yendiki et al.,  
60 2022) and benchmarks conducted through international tractography challenges (Maier-  
61 Hein et al., 2017; Nath et al., 2020; Schilling et al., 2021; Maffei et al., 2022). Importantly,  
62 tractography is well-known to miss connections that are present in the brain, *i.e.*, false  
63 negatives (Aydogan et al., 2018), and at the same time, it generates connections that do  
64 not exist, *i.e.*, false positives (Schilling et al., 2019).

65 The goal of this work was to develop a system that computes and displays brain's structural  
66 connections in real time for guiding TMS. Our approach separates the slow, offline

67 dMRI data pre-processing, and in real time, it computes the streamlines by our custom  
68 tractography algorithm ([Aydogan and Shi, 2021](#)) and displays the connections using an in-  
69 house developed neuronavigation system ([Souza et al., 2018](#)). By incorporating anatomical  
70 constraints, the proposed technique removes implausible streamlines, decreasing the  
71 output of false positive connections. Our visualization method also features a transfer  
72 function for streamline opacity, providing a visual feedback on the reliability of the  
73 displayed streamlines. In this article, we demonstrate the feasibility and real-time  
74 performance of our technique for TMS applications with synthetic data and in experiments  
75 with four healthy subjects.

## 76 2. Method

77 As shown in Fig. 1, our workflow is divided into two parts: an offline analysis (preparatory)  
78 and an online tractography computation with neuronavigation (real-time operation).

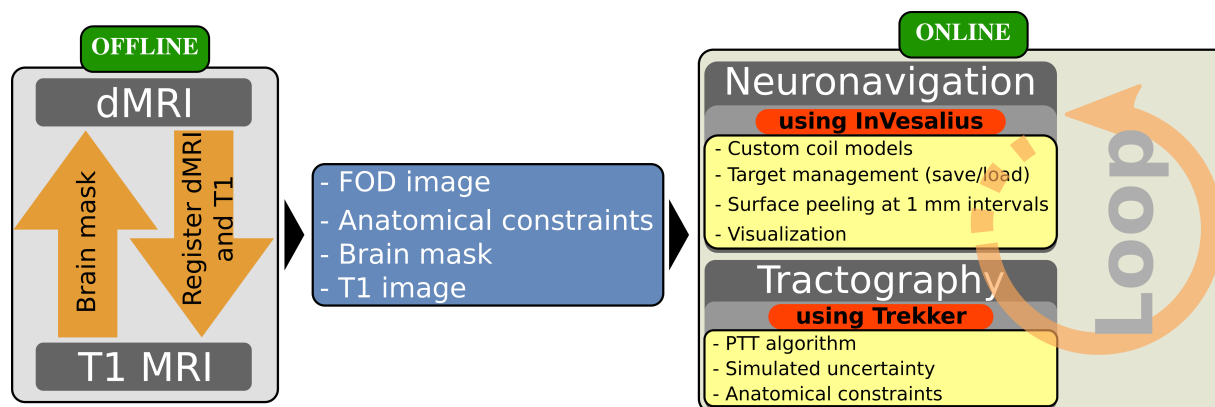

Figure 1: For real-time tractography-assisted neuronavigation, we combine information from T1 and dMRI data. In the offline (preparatory) part, necessary inputs for the online (real-time) part are prepared. The necessary inputs are: *i*) fiber orientation distribution (FOD) image, needed for fiber tracking, *ii*) anatomical constraints, needed to reduce false positives during tractography, *iii*) segmented brain mask, needed to compute the peeled brain surfaces, and *iv*) T1 image, to show the grayscale brain image on the peeled surfaces. The online part consists of the neuronavigation and tractography modules that continuously run in a multi-threaded loop. Neuronavigation and tractography are done using our custom software InVesalius (Souza et al., 2018) and Trekker (<https://dmritrekker.github.io/>), respectively. The main features used during real-time operation are inside the yellow boxes.

### 79 2.1. Offline processing

80 dMRI was denoised (Veraart et al., 2016) and corrected for artefacts induced by eddy  
81 currents and motion (Andersson and Sotiropoulos, 2016). Fiber orientation distribution  
82 (FOD) image was computed using the compartment model approach in Tran and Shi  
83 (2015). For anatomically constrained tractography (Smith et al., 2012), labels for white  
84 matter, cerebrospinal fluid (CSF), and the region outside the brain were defined from  
85 Freesurfer's *reconall* (Fischl, 2012).

86 *2.2. Online processing*

87 *2.2.1. Tractography*

88 **Fiber tracking:** Our parallel transport tractography (PTT) algorithm ([Aydogan and](#)  
89 [Shi, 2019, 2021](#)) is implemented in our in-house developed, open-source software Trekker  
90 (<https://dmritrekker.github.io/>). To reduce false positive connections, the following  
91 anatomical constraints are applied as *pathway rules* in Trekker:

- 92 1. To prevent improper termination  $\rightarrow$  *discard\_if\_ends\_inside* white matter
- 93 2. To prevent projecting through CSF  $\rightarrow$  *discard\_if\_enters* CSF
- 94 3. To prevent leaking outside the brain  $\rightarrow$  *stop\_at\_entry* outside the brain

95 **Visualization of uncertainty:** In this work, we introduce a novel visualization  
96 approach using the observations in [Aydogan et al. \(2018\)](#), which reports performance  
97 trends in tractography based on parameter combination choices. For example, a low FOD  
98 threshold parameter helps to find intricate connections, reducing false negatives, but at the  
99 same time this increases false positive streamlines. This prior information regarding the  
100 trade-off between sensitivity and specificity offers an opportunity to visualize uncertainty  
101 based on parameter choices. To visualize uncertainty in the fiber tracking results, we  
102 designed a transfer function that assigns each streamline an opacity value based on the  
103 fiber tracking parameter used to obtain that streamline. A precursory version of this  
104 approach was presented in ISMRM 2020 ([Aydogan, 2020](#)). Graphical explanation of this  
105 approach and the transfer function are shown in Fig. 2.

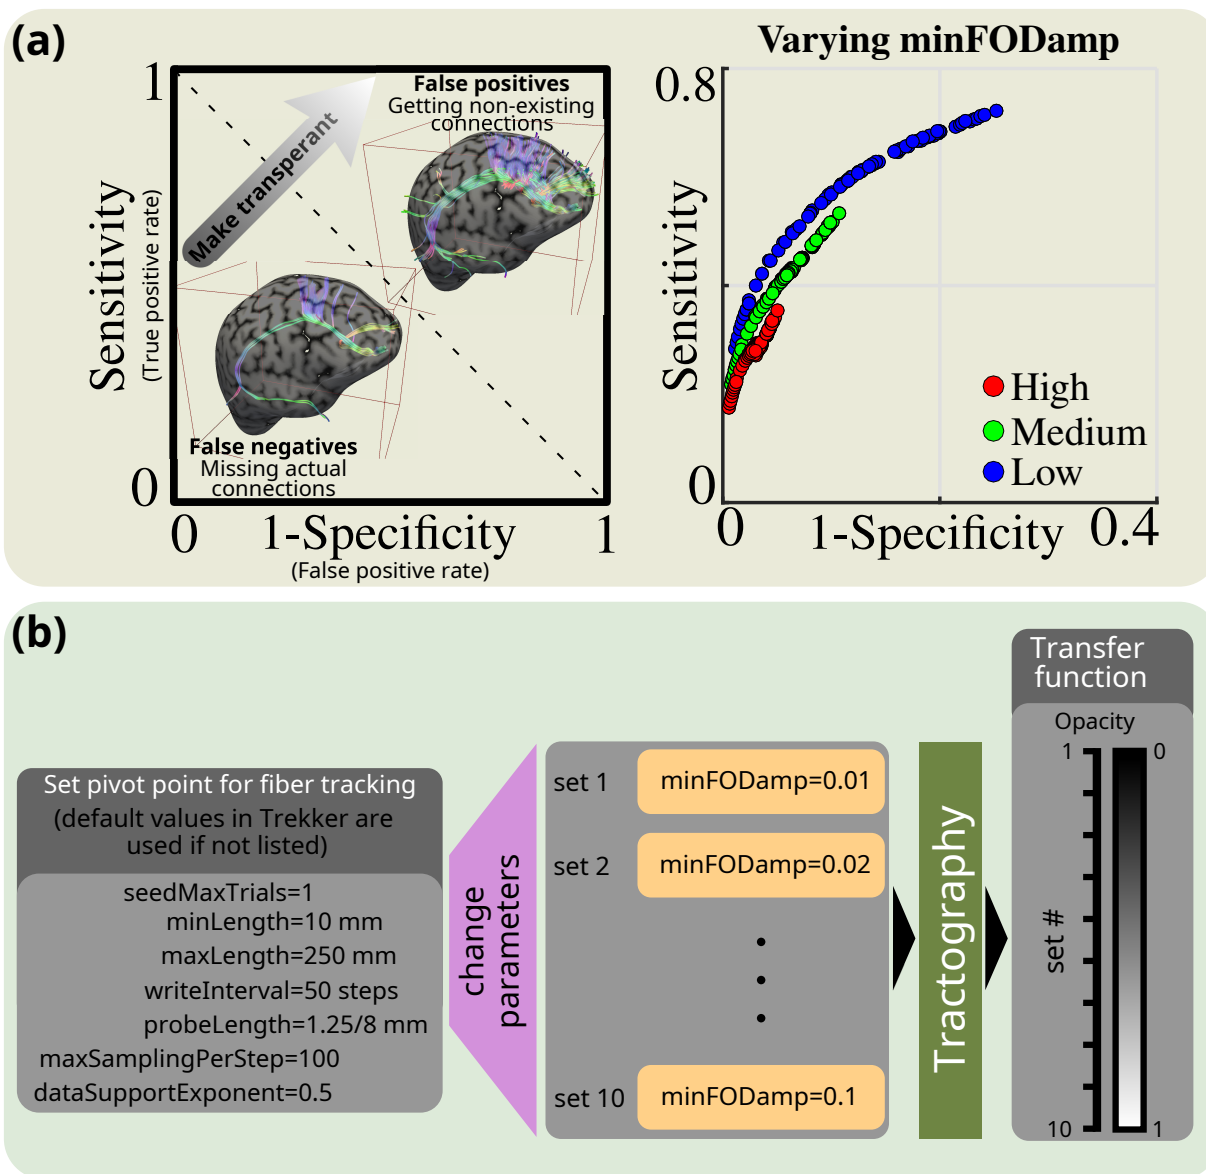

Figure 2: (a) Sensitivity and specificity plane to demonstrate the trade-off in tractography performance. The ROC curve can be traversed by varying the FOD threshold (*minFODamp* parameter in Trekker). Low values for FOD threshold lead to increased sensitivity at the cost of decreased specificity (Aydogan and Shi, 2018). By displaying the streamlines generated using low FOD thresholds with more transparency, we provide visual information to the operator regarding increased possibility of false connectivity as a result of the corresponding parameter choice. (b) Fixed parameters used for fiber tracking and the range of values for the varying FOD threshold as well as the corresponding transfer function, *i.e.*, the opacity used for the visualization.



106 *2.2.2. Implementation of real-time tractography during neuronavigation*

107 The real-time visualization of tractograms during neuronavigation was achieved by  
108 integrating the Python API of Trekker in the open-source, free neuronavigation software  
109 InVesalius Navigator (Souza et al., 2018) (<https://invesalius.github.io/>). Tracking  
110 parameters are saved in a .json file and can be updated, to instantly fine-tune fiber  
111 tracking parameters. During neuronavigation, a continuous loop starts as soon as the  
112 TMS coil is detected by the tracking camera. Then,  $N$  seed coordinates for computing  
113 the streamlines are pseudo-randomly sampled from a sphere with 1.5-mm radius. The  
114 center of the sphere is defined as the closest white-matter point inside a rectangular prism  
115 created with its longitudinal axis coincident to a line projected from the TMS coil center.  
116 The rectangular prism has a square profile of  $2 \times 2$  mm<sup>2</sup>, a height of 20 mm with grid  
117 points spaced by 1 mm, and is offset by 30 mm from the TMS coil surface. The  $N$   
118 seed coordinates initiate the computation of  $N$  streamlines in each iteration; where  $N$  is  
119 automatically set as the number of computer's processor's threads. At each iteration, the  
120 *minFODamp* parameter is adjusted as shown in Fig. 2 and streamlines are visualized every  
121 100 ms with the corresponding opacity. Because 10 parameter combinations are used for  
122 uncertainty visualization, these combinations are repeated at every 10<sup>th</sup> iteration. The  
123 loop runs continuously until 1000 streamlines are displayed or the coil is moved by at least  
124 2 mm. This distance threshold was implemented to avoid excessive removal and addition  
125 of streamlines for small jitters in the TMS coil coordinates. If the TMS coil moves more  
126 than 2 mm from the first point that the white matter was detected, streamlines that were  
127 previously displayed are removed, otherwise they are continuously added.

## 128 **3. Experimental setup**

### 129 *3.1. Synthetic characterization*

130 We studied the tracking parameters for uncertainty visualization with offline experiments  
131 conducted on the ISMRM 2015 tractography challenge dataset ([Maier-Hein et al., 2017](#)).  
132 The details about the data can be obtained from [http://www.tractometer.org/ismrm\\_](http://www.tractometer.org/ismrm_2015_challenge/data)  
133 [2015\\_challenge/data](http://www.tractometer.org/ismrm_2015_challenge/data). We used the fiber tracking parameters shown in Fig. 2 to compute  
134 10 million streamlines in the whole brain by randomly seeding the white-matter mask. The  
135 process is repeated for each of the 10 *minFODamp* values. Bundle overreach and overlap  
136 were compared against the submissions made to the original challenge.

### 137 *3.2. TMS experiment*

138 Experiments were done on four healthy male volunteers (age: 30–42). Written informed  
139 consents were collected from all participants. The study was done in accordance with  
140 the Declaration of Helsinki and approved by the Coordinating Ethics Committee of the  
141 Hospital District of Helsinki and Uusimaa.

#### 142 *3.2.1. MRI data*

143 MRI data were acquired using a MAGNETOM Skyra 3T MR scanner (Siemens Healthcare,  
144 Erlangen, Germany) with a 32-channel head coil. MRI measurements were done at the  
145 Advanced Magnetic Imaging Centre of Aalto NeuroImaging. For T1 image, a sagittal

146 MPRAGE protocol with TE=3.3 ms, TR=2530 ms,  $1\times 1\times 1$  mm<sup>3</sup> voxel dimension and  
147  $176\times 256\times 256$  voxels were used. The dMRI were acquired according to a multi-shell  
148 high-angular resolution diffusion imaging (HARDI) scheme with TE=107 ms, TR=3.9  
149 s,  $2\times 2\times 2$  mm<sup>3</sup> voxel dimension and  $176\times 256\times 256$  voxels. Data were collected from a  
150 total of 100 gradient directions that are uniformly distributed on a sphere. 18, 32 and  
151 50 volumes were distributed to three shells with  $b$ -values 900, 1600 and 2500 s/mm<sup>2</sup>,  
152 respectively. 11  $b_0$  images were interleaved between the volumes and additional four  $b_0$   
153 images were collected at the end according to a reverse phase-encoding scheme, for motion  
154 and distortion correction.

### 155 3.2.2. TMS experimental protocol

156 Fig. 3 shows our setup. Navigation was performed with an infrared Polaris Vicra camera  
157 (Northern Digital Inc., Waterloo, ON, Canada) and tracking probes with passive reflective  
158 spherical markers. Fiducial registration errors were kept below 3 mm (Souza et al., 2018).  
159 Experiments were performed with a Dell Precision 7530 (CPU Intel 6 core 2.6 GHz i7-  
160 8850H, 32 GB RAM, 1TB SSD hard drive, NVidia Quadro P2000 graphics card, and  
161 Windows 10 64 bits).

162 We studied the feasibility of reliable and repeatable targeting of four major connections  
163 in the left part of the brain involved in: motor, cognitive, speech, and visual functions.  
164 Therefore, we targeted the *i*) primary motor cortex (M1), *ii*) dorsolateral prefrontal cortex  
165 (DLPFC), *iii*) Broca's area (BA44), and *iv*) primary visual cortex (V1), respectively.

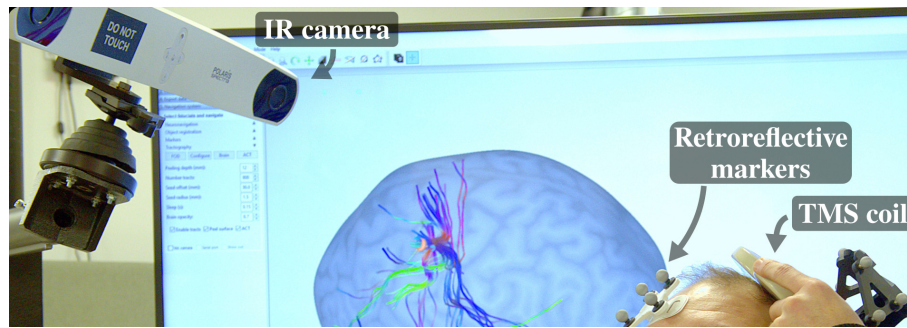

Figure 3: *Tractography-assisted nTMS setup. The display with the InVesalius user interface shows the peeled brain surface and the streamlines obtained from the real-time TMS coil position. The coil is being held by the operator and tracked by the neuronavigation software that analyzes data from an infrared (IR) camera and retroreflective markers.*

166 We initially saved the intended TMS target locations related to these four regions in  
167 the InVesalius software interface to guide the TMS coil placement. The M1 target was  
168 identified based on abductor pollicis brevis (APB) muscle twitches. DLPFC was identified  
169 visually from T1 MRIs as described in [Lioumis et al. \(2009\)](#). Broca's area was identified  
170 as described in speech cortical mapping studies ([Lioumis et al., 2012](#); [Corina et al., 2010](#);  
171 [Krieg et al., 2017](#)). The primary visual cortex was selected based on visual inspection of  
172 the anatomical MRIs and by applying single TMS pulses that elicited phosphenes in the  
173 participant's visual field.

174 For assessing the reproducibility of the displayed streamlines, we placed the TMS coil  
175 on the selected target and recorded the TMS coil coordinates and corresponding seed  
176 coordinates used to compute the streamlines in real time. This process was repeated ten  
177 times for each of the four targets by removing the coil from the vicinity of participants's  
178 head after each trial.

179 *3.2.3. Data analysis*

180 The seed coordinates obtained during the experiments were used to study: **1)** how offline  
181 filtering (selection) of streamlines compare against real-time tractography, and **2)** the  
182 number of streamlines to display.

183 For **1)**, we generated 10 million streamlines for each of the 10 *minFODamp* values by  
184 randomly seeding the whole brain. Each tractogram was then filtered so that only those  
185 streamlines that passed through the 1.5-mm sphere centered at the recorded target points  
186 remained. For each target region, we reported the number of selected streamlines.

187 For **2)**, we investigated the overlap between the tractograms with increasing number of  
188 streamlines. For that, we first generated 100000 streamlines from each seed using each  
189 of the 10 *minFODamp* values. The combined tractogram with 1 million streamlines was  
190 used as a reference. We then simulated the case during the real-time experiment, where  
191 only a subset of these streamlines were shown. To that end, we generated 7 subsets with  
192 100, 300, 1000, 3000, 10000, 30000 and 100000 streamlines. Each subset contained an  
193 equal number of streamlines computed with different *minFODamp* values. The overlap  
194 was computed by finding the intersection between thresholded ( $>0$ ) track-density images  
195 (TDI) ([Calamante et al., 2010](#)).

## 196 4. Results

### 197 4.1. Synthetic characterization

198 Fig. 4a shows the overlap and overreach values with respect to *minFODamp*. The overlap  
199 shows how much the tractogram aligns with the ground truth, which is a measure of true  
200 positive connection. The overreach shows how much of the tractogram is outside the  
201 ground truth, which is a measure of false positive connections. In Fig. 4b, we picked three  
202 tractograms and combined them with and without uncertainty visualization. The three  
203 tractograms were obtained from whole-brain tractograms computed with *minFODamp*  
204 values of 0.01, 0.05 and 0.1, by selecting 500 streamlines within a sphere of radius 1.5-mm  
205 that was manually placed in the primary motor cortex.

### 206 4.2. Navigated TMS with real-time tractography

207 Our setup is shown in the supplementary video. The operator can observe the structural  
208 connections while the coil is moved. For demonstrative purposes, the operator shows the  
209 connections on various locations. Consent of the model is obtained to publish his face in  
210 the video.

### 211 4.3. TMS experiment

212 We compared the number of streamlines and overlap percentages using tractograms  
213 obtained offline. Fig. 5a shows the number of streamlines that were obtained by filtering

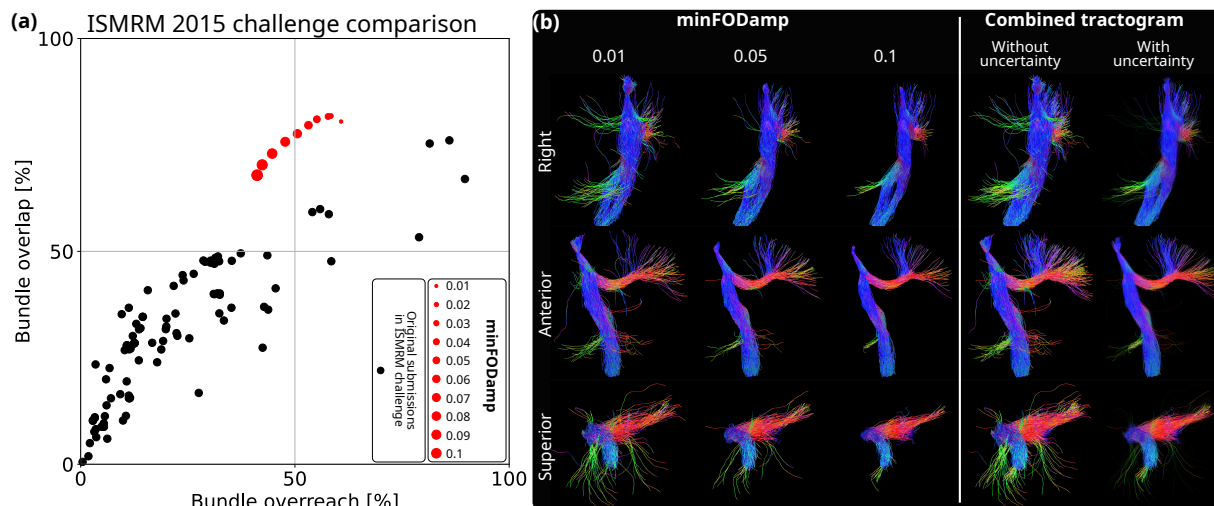

Figure 4: The variation in tractography performance for uncertainty visualization was tested using the ISMRM 2015 tractography challenge data. (a) Each red dot represents a score obtained for a tractogram with 10 million streamlines generated by randomly seeding the whole-brain mask using each of the 10 *minFODamp* parameters shown in Fig. 2. The obtained scores with Trekker are highly competitive against the original submissions to the challenge. The trend shows the expected trade-off between true and false positives, where increasing the *minFODamp* parameter decreases bundle overreach, *i.e.*, false positives, at the cost of reduced bundle overlap, *i.e.*, true positives. (b) Tractograms show that increasing *minFODamp* produces streamlines that may not sample the whole extent of connections. Tractograms with lower *minFODamp* values reach more regions; however, streamlines lose organization, which can lead to increased false positives. Combination of the tractograms with uncertainty visualization shows all the streamlines. But because streamlines computed with lower *minFODamp* are shown with more transparency, user is provided with visual information that these connections are more likely to be false positives than other streamlines shown on display.

214 offline computed, large-scale whole-brain tractograms that contain 100 million streamlines  
 215 for each subject. We observe that there is large variability among subjects, brain regions,  
 216 and repetitions. Nearly 15000 streamlines were obtained for many repetitions in the V1  
 217 area of subject #4. However, for the same area of subject #3, many times it was not  
 218 possible to obtain any streamline. We observe a general trend of decreasing number of  
 219 streamlines with the increase in *minFODamp*. For a few seed points, however, the number  
 220 of streamlines increase with *minFODamp*, *e.g.*, M1 seed #4 of subject #2.

221 In Fig. 5b, we showed the overlap values for the seed-based approach that is used for real-  
222 time tractography-based neuronavigation. The overlap percentages for increasing number  
223 of streamlines were computed for each seed, against the corresponding reference tractogram  
224 with 1 million streamlines (see Section 3.2.3). As expected, the overlap increases with the  
225 number of streamlines. For comparison, we also computed the overlap between the results  
226 of the offline filtering approach and the reference tractograms. Black dots in the figure show  
227 the closest overlap values obtained with the offline filtering results. The maximum number  
228 of dots is 64 at 30000 streamlines. There are 57 dots at 100000 thousand streamlines.  
229 Seed-based tractography covers a large portion of the target area after a few thousands  
230 of streamlines. This can be reached in a few seconds during real-time operation. When  
231 compared to the filtering approach, seed-based tractography covers a larger portion of the  
232 brain after a few tens of thousands of streamlines for many seed points, *e.g.*, Broca's area  
233 of subject #1 or M1 of subject #4.



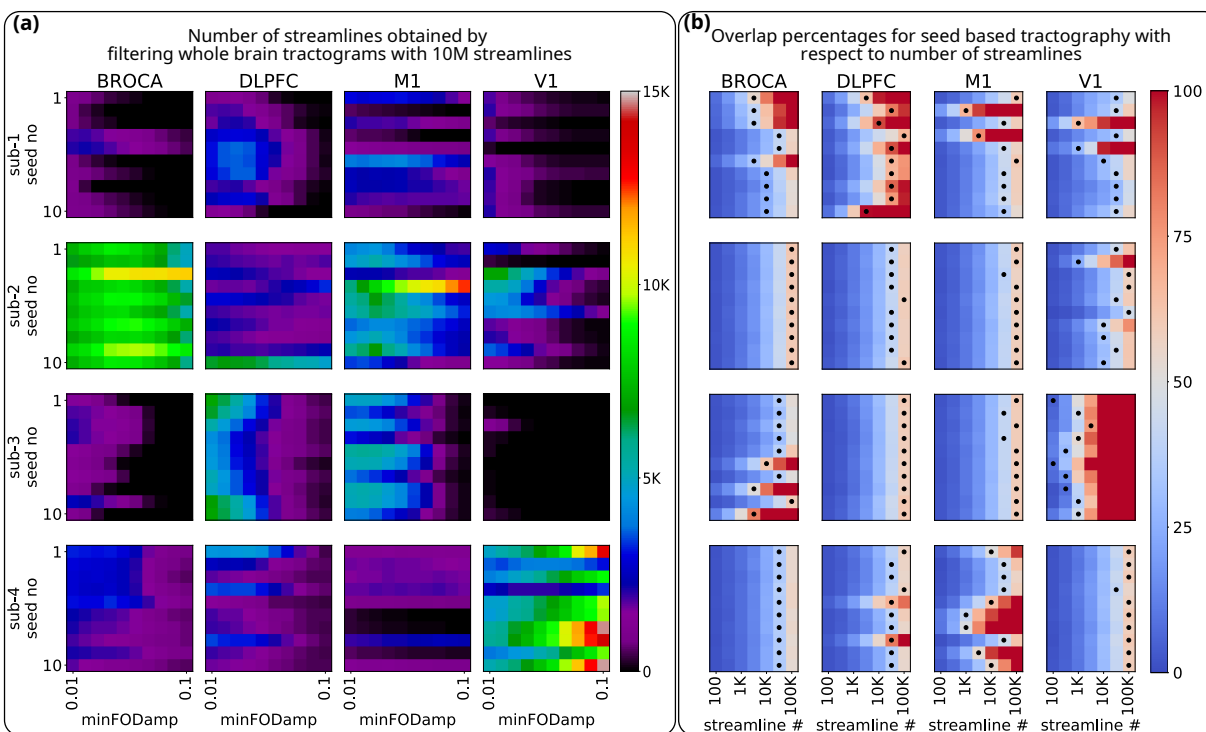

Figure 5: (a) shows the number of offline filtered streamlines. Each value is obtained by selecting streamlines that pass through the seed regions from a whole-brain tractogram containing 10 million streamlines. Values are reported for each of the 10 repetitions of coil placement, *i.e.*, seed point, as well as 10 different  $minFODamp$  values. (b) shows overlap percentages with respect to increasing the number of streamlines. Here, the streamlines are obtained offline with the same method as the real-time case. The reference contains 1 million streamlines obtained by combining 10 seed-based tractograms (see Section 3.2.3). Each of the 10 tractograms are computed with a different  $minFODamp$  value and contains 100000 streamlines. Black dots show the overlap obtained by filtering the whole-brain tractograms that contain 100 million streamlines for each seed.

## 234 5. Discussion

235 We developed a real-time platform to compute and visualize structural connections in  
236 the brain with features tailored for guiding TMS applications. Our method uses state-of-  
237 the-art tractography practises that have received high scores in international challenges,  
238 yielding visual representations that are as accurate as possible. These practises include  
239 the use of: *i*) a modern FOD computation method that can handle complex white-matter  
240 fiber organizations ([Tran and Shi, 2015](#)), *ii*) application of anatomical constraints ([Smith  
241 et al., 2012](#)), and *iii*) a state-of-the-art fiber tracking algorithm ([Aydogan and Shi, 2021](#)).  
242 These practices provide improvements in the quality of tractograms compared to previous  
243 real-time tractography tools ([Golby et al., 2011](#); [Elhawary et al., 2011](#); [Chamberland et al.,  
244 2014](#)).

### 245 *Technical aspects of real-time tractography*

246 There are two main ways to obtain the streamlines for visualization in real time. The  
247 first is to perform the fiber tracking in real time, as we did in our work. The second is to  
248 compute a large number of streamlines, and then select the relevant ones in real time. The  
249 ability to adjust fiber tracking parameters is arguably the most important benefit of our  
250 system. Because even for the same brain, optimal tractography parameters vary depending  
251 on the region or the white-matter tract ([Aydogan et al., 2018](#)). On the other hand, the  
252 availability of a pre-computed whole-brain tractogram enables to compute connectivity  
253 strengths and matrices ([Daducci et al., 2016](#)) — not possible to compute with real-time  
254 seed-based tractography.

255 Tractography algorithms are more complicated than filtering tractograms. However, real-  
256 time tractography has advantages when managing computer resources, because it does  
257 not require an interface between the hard drive and memory. On the other hand, large  
258 pre-computed whole-brain tractograms (with 100 million streamlines), can require 100 GB  
259 or more hard drive space, that can introduce challenges in clinics when transferring the  
260 data. Overall, both real-time tracking and filtering are suitable for tractography-assisted  
261 neuronavigation, and depending on the location in the brain, up to several hundreds  
262 or a few thousands streamlines per second can be obtained using standard computers.  
263 When compared against alternative offline practices, our real-time tractography pipeline  
264 does not compromise from quality in order to speed up the computation. Therefore,  
265 doing tractography in advance would not have improved the results that we show to the  
266 operator. Future research may lead to alternative visualization techniques that are capable  
267 of combining information from offline whole-brain tractograms to highlight higher-order  
268 connections of the seed region and its connectivity strength with the rest of the brain.

269 *Design aspects of streamline visualization and TMS neuronavigation*

270 Our work distinguishes from previous works through the use of novel visualization  
271 techniques: *i)* Displaying tractograms with the peeled brain surface is a natural choice for  
272 TMS neuronavigation that was not demonstrated before. *ii)* Our dynamic, incremental,  
273 visualization of streamlines, distributes the complicated connectivity information along  
274 time, helping the operator to interpret the complex information. In contrast to previous

275 visualization approaches that show a snapshot for connectivity (Golby et al., 2011;  
276 Elhawary et al., 2011; Chamberland et al., 2014), we are showing a movie, where thousands  
277 of streamlines can be displayed in an iterative and sequential fashion. *iii*) The uncertainty  
278 visualization approach is primarily designed for improved real-time experience, which to  
279 our knowledge, is the first time that transparency is used to convey information about  
280 uncertainty. For that, we first showed this trend using the ISMRM 2015 challenge data.  
281 While the exact overlap and overreach values shown in Fig. 4 are going to be different for  
282 other data, the performance trend is expected to be similar (Aydogan et al., 2018). As a  
283 result, our proposed uncertainty visualization provides a new insight about the reliability  
284 of the streamlines. While the current study develops new methods for visualization  
285 and provides a qualitative evaluation, future research should seek to answer whether the  
286 approaches quantitatively benefit the TMS operator during neuronavigation, for example,  
287 by improving treatment outcomes through individualized targeting.

### 288 *Impact of the seeding strategy*

289 Our current setup estimates the seed region using the coil position and the white-matter  
290 segmentation. The brain areas affected by TMS can be better estimated with the E-field  
291 distribution (Weise et al., 2020; Aberra et al., 2020; Sollmann et al., 2016). Even so, the  
292 response to TMS is still uncertain, and the fiber orientations can play a role (Laakso et al.,  
293 2013). Therefore, the integration of real-time E-field estimates and tractography might  
294 improve the accuracy of future TMS-targeting methods.

295 Because TMS may primarily affect regions that are close to the coil (Siebner et al., 2022),  
296 gyral bias becomes a major problem for TMS neuronavigation with tractography. We  
297 believe this is reflected in the results shown in Fig. 5a. Even with a large number of  
298 streamlines (100 million), we observe that some regions were not reached by tractography,  
299 *e.g.*, V1 of subject #3. In Fig. 5, we not only observe poor streamline counts for some  
300 seeds, but we also see a large variability in the count that reach the seed regions for  
301 different subjects. For instance, while several thousands of streamlines could be obtained  
302 for most of the seeds in the Broca's region of subject #2, no streamlines could be obtained  
303 for subject #1 and subject #3 for many seeds in the same region. Some of this variability  
304 may be due to differences in brain structure between individuals; however, we believe that  
305 the poor dMRI signal and fiber configuration variability around the cortex can be more  
306 significant factors. These highlight that even though we carefully adapted the state-of-  
307 the-art practices in our pipeline, there is room for improvement.

### 308 *Immediate applications of real-time tractography-assisted TMS neuronavigation*

309 nTMS has been used with tractography to improve surgical outcomes (Picht et al., 2016)  
310 by identifying and visualizing eloquent motor areas during pre-operative planning (Frey  
311 et al., 2014), . This is achieved by finding and saving nTMS-based seed points in a disk  
312 or hospital's picture archiving and communication system (PACS) (Mäkelä et al., 2015),  
313 followed by neurosurgeons' using a separate software for seed-based tractography. Real-  
314 time tractography-assisted TMS neuronavigation can save time and costs by eliminating  
315 the need for a separate tractography step.

316 Our real-time tractography-assisted neuronavigation could be highly useful for paired  
317 associative-stimulation (PAS) (Koch and Rothwell, 2009; Koch et al., 2010). PAS has  
318 been shown to induce plastic changes (Classen et al., 2004), by involving stimulation  
319 of multiple targets, *e.g.*, two brain regions connected with cortico-cortical projections.  
320 Traditionally, one of the targets is set during the experiment based on functional  
321 measurements while the other targets are set manually based on anatomical MRI (Koch  
322 et al., 2013). Recently, Hernandez-Pavon et al. (2022) used dMRI-based tractography to  
323 post-hoc demonstrate that their stimulation sites were connected. Real-time tractography-  
324 assisted neuronavigation enables more precise and personalized PAS protocols in which  
325 connected sites can be identified during the experiment.

326 Recent developments in multi-channel TMS technology (Souza et al., 2022; Nieminen et al.,  
327 2022) opened a possibility for automated targeting (Tervo et al., 2022) and fast mapping  
328 of brain functions. Real-time tractography can play an important role for automated  
329 scanning algorithms to optimize stimulation parameters based on the underlying brain  
330 network. This would enable precise targeting of local and whole-brain networks for  
331 personalized connectomic neuromodulation (Horn and Fox, 2020).

### 332 *Limitations of tractography*

333 We believe that the limited accuracy of tractography is the main challenge for the  
334 adaptation of real-time tractography-assisted neuronavigation. There are several factors  
335 that can negatively impact the reliability of tractograms. dMRI data acquired with

336 low resolution and/or few diffusion samples (Calabrese et al., 2014), and sub-optimal  
337 pre-processing choices could lead to worse tractograms (Irfanoglu et al., 2012). It was  
338 shown that modern white-matter microstructure models, *e.g.*, those that can distinguish  
339 crossing fiber configurations, provide superior tractography results when compared against  
340 traditional techniques, such as the diffusion tensor imaging (DTI) (Farquharson et al.,  
341 2013). The choice of tractography algorithms (Sarwar et al., 2019), and the use  
342 of anatomical constraints were also shown to affect the results (Smith et al., 2012).  
343 Tractography is known to perform worse where fibers cross (Jeurissen et al., 2013).  
344 Moreover, the two-year long (2019–2020) IronTract challenge ([https://irontract.mgh.  
345 harvard.edu/](https://irontract.mgh.harvard.edu/)) show that fiber configurations that go beyond crossing, *e.g.*, fanning,  
346 branching, can be more challenging for tractography (Maffei et al., 2020, 2022; Schilling  
347 et al., 2022). Due to differences in fiber configuration in gray and white matters,  
348 and the folded geometry of the brain, tractography algorithms also tend to be biased  
349 towards terminating the streamlines at gyral crowns (Reveley et al., 2015). Overall,  
350 tractograms contain large amounts of false positives and false negatives that have been  
351 shown in several previous validation studies and tractography competitions (Thomas  
352 et al., 2014; Maier-Hein et al., 2017; Schilling et al., 2019; Aydogan et al., 2018; Girard  
353 et al., 2020; Maffei et al., 2020, 2022). While the aforementioned limitations impact the  
354 quality of tractography, we believe that our techniques represent a significant progress  
355 in tractography-assisted neuronavigation, proposing a solution that shows the brain’s  
356 anatomical connections in a way that is most accurate and helpful for brain stimulation,  
357 especially for TMS applications.

## 358 **6. Conclusion**

359 We developed a real-time tractography-assisted neuronavigation system for TMS. We  
360 anticipate that this technology is a critical step towards personalized brain stimulation  
361 targeting based on anatomical networks with potential applications in research and clinical  
362 environments.



363 **CRedit authorship contribution statement: Dogu Baran Aydogan:** Con-  
364 ceptualization, Methodology, Software, Formal analysis, Investigation, Resources,  
365 Visualization, Writing - Original Draft, Writing – review & editing. **Victor H. Souza:**  
366 Conceptualization, Methodology, Software, Formal analysis, Investigation, Resources,  
367 Visualization, Writing - Original Draft, Writing – review & editing. **Renan H.**  
368 **Matsuda:** Software, Investigation, Writing - Review & Editing. **Pantelis Lioumis:**  
369 Conceptualization, Investigation, Resources, Writing - Original Draft, Writing – review &  
370 editing. **Risto J. Ilmoniemi:** Conceptualization, Resources, Writing - Review & Editing,  
371 Supervision, Project administration, Funding acquisition.

372 **Acknowledgements:** This project has received funding from the Academy of Finland  
373 (grants #348631, #349985, and #353798), from Helsinki University Central Hospital  
374 (VTR grant #TYH2022224), and from the European Research Council (ERC) under the  
375 European Union’s Horizon 2020 research and innovation programme (ConnectToBrain;  
376 grant agreement no. 810377). RHM has received funding from the Conselho Nacional  
377 de Desenvolvimento Científico e Tecnológico (grant no. 141056/2018-5) and from the  
378 FAPESP Research, Innovation and Dissemination Center for Neuromathematics (grant  
379 no. 2013/07699-0). Aalto NeuroImaging (ANI) infrastructure was used for MRI data  
380 collection at AMI, and for experiments at Aalto TMS. We thank Joonas Laurinoja and  
381 Tuomas Mutanen for their help with the video production. The authors acknowledge the  
382 computational resources provided by the Aalto Science-IT project.

383 **References**

- 384 Aberra, A.S., Wang, B., Grill, W.M., Peterchev, A.V., 2020. Simulation of transcranial  
385 magnetic stimulation in head model with morphologically-realistic cortical neurons.  
386 *Brain Stimulation* 13, 175–189. doi:<https://doi.org/10.1016/j.brs.2019.10.002>.
- 387 Andersson, J.L.R., Sotiropoulos, S.N., 2016. An integrated approach to correction for  
388 off-resonance effects and subject movement in diffusion MR imaging. *NeuroImage* 125,  
389 1063–1078. doi:[10.1016/j.neuroimage.2015.10.019](https://doi.org/10.1016/j.neuroimage.2015.10.019).
- 390 Aydogan, D.B., 2020. Visualization of uncertainty in tractograms using ROC-based  
391 transfer functions for real-time TMS applications, in: *Proceedings of the 28<sup>th</sup> Annual*  
392 *Meeting of ISMRM*. Online.
- 393 Aydogan, D.B., Jacobs, R., Dulawa, S., Thompson, S.L., Francois, M.C., Toga, A.W.,  
394 Dong, H., Knowles, J.A., Shi, Y., 2018. When tractography meets tracer injections: a  
395 systematic study of trends and variation sources of diffusion-based connectivity. *Brain*  
396 *Structure and Function* 223, 2841–2858. doi:[10.1007/s00429-018-1663-8](https://doi.org/10.1007/s00429-018-1663-8).
- 397 Aydogan, D.B., Shi, Y., 2018. Tracking and validation techniques for topographically  
398 organized tractography. *NeuroImage* 181, 64–84. doi:[10.1016/j.neuroimage.2018.](https://doi.org/10.1016/j.neuroimage.2018.06.071)  
399 [06.071](https://doi.org/10.1016/j.neuroimage.2018.06.071).
- 400 Aydogan, D.B., Shi, Y., 2019. A novel fiber-tracking algorithm using parallel transport  
401 frames, in: *Proceedings of the 27<sup>th</sup> Annual Meeting of ISMRM*. Montreal.

402 Aydogan, D.B., Shi, Y., 2021. Parallel transport tractography. *IEEE Transactions on*  
403 *Medical Imaging* 40, 635–647. doi:[10.1109/TMI.2020.3034038](https://doi.org/10.1109/TMI.2020.3034038).

404 Calabrese, E., Badea, A., Coe, C.L., Lubach, G.R., Styner, M.A., Johnson, G.A., 2014.  
405 Investigating the tradeoffs between spatial resolution and diffusion sampling for brain  
406 mapping with diffusion tractography: Time well spent? *Human Brain Mapping* 35,  
407 5667–5685.

408 Calamante, F., Tournier, J.D., Jackson, G.D., Connelly, A., 2010. Track-density imaging  
409 (TDI): Super-resolution white matter imaging using whole-brain track-density mapping.  
410 *NeuroImage* 53, 1233–1243.

411 Cash, R.F., Cocchi, L., Lv, J., Fitzgerald, P.B., Zalesky, A., 2021. Functional magnetic  
412 resonance imaging-guided personalization of transcranial magnetic stimulation treat-  
413 ment for depression. *JAMA Psychiatry* 78, 337–339. doi:[10.1001/jamapsychiatry.](https://doi.org/10.1001/jamapsychiatry.2020.3794)  
414 [2020.3794](https://doi.org/10.1001/jamapsychiatry.2020.3794).

415 Chamberland, M., Whittingstall, K., Fortin, D., Mathieu, D., Descoteaux, M., 2014.  
416 Real-time multi-peak tractography for instantaneous connectivity display. *Frontiers in*  
417 *Neuroinformatics* 8, 59.

418 Classen, J., Wolters, A., Stefan, K., Wycislo, M., Sandbrink, F., Schmidt, A., Kunesch,  
419 E., 2004. Paired associative stimulation. *Supplements to Clinical neurophysiology* 57,  
420 563–569.

421 Corina, D.P., Loudermilk, B.C., Detwiler, L., Martin, R.F., Brinkley, J.F., Ojemann, G.,

- 422 2010. Analysis of naming errors during cortical stimulation mapping: implications for  
423 models of language representation. *Brain and Language* 115, 101–112.
- 424 Daducci, A., Dal Palú, A., Descoteaux, M., Thiran, J.P., 2016. Microstructure informed  
425 tractography: pitfalls and open challenges. *Frontiers in Neuroscience* 10, 247.
- 426 Di Lazzaro, V., Rothwell, J.C., 2014. Corticospinal activity evoked and modulated by  
427 non-invasive stimulation of the intact human motor cortex. *The Journal of Physiology*  
428 592, 4115–4128. doi:<https://doi.org/10.1113/jphysiol.2014.274316>.
- 429 Elhawary, H., Liu, H., Patel, P., Norton, I., Rigolo, L., Papademetris, X., Hata, N., Golby,  
430 A.J., 2011. Intraoperative real-time querying of white matter tracts during frameless  
431 stereotactic neuronavigation. *Neurosurgery* 68, 506–516.
- 432 Farquharson, S., Tournier, J.D., Calamante, F., Fabinyi, G., Schneider-Kolsky, M.,  
433 Jackson, G.D., Connelly, A., 2013. White matter fiber tractography: why we need  
434 to move beyond DTI. *Journal of Neurosurgery* 118, 1367–1377.
- 435 Fischl, B., 2012. Freesurfer. *NeuroImage* 62, 774–781.
- 436 Fitzgerald, P.B., Hoy, K., McQueen, S., Maller, J.J., Herring, S., Segrave, R.,  
437 Bailey, M., Been, G., Kulkarni, J., Daskalakis, Z.J., 2009. A randomized trial of  
438 rTMS targeted with MRI based neuro-navigation in treatment-resistant depression.  
439 *Neuropsychopharmacology* 34, 1255–1262.
- 440 Frey, D., Schilt, S., Strack, V., Zdunczyk, A., Rösler, J., Niraula, B., Vajkoczy, P., Picht,  
441 T., 2014. Navigated transcranial magnetic stimulation improves the treatment outcome

442 in patients with brain tumors in motor eloquent locations. *Neuro-oncology* 16, 1365–  
443 1372.

444 Girard, G., Caminiti, R., Battaglia-Mayer, A., St-Onge, E., Ambrosen, K.S., Eskildsen,  
445 S.F., Krug, K., Dyrby, T.B., Descoteaux, M., Thiran, J.P., et al., 2020. On the  
446 cortical connectivity in the macaque brain: A comparison of diffusion tractography  
447 and histological tracing data. *NeuroImage* 221, 117201.

448 Golby, A.J., Kindlmann, G., Norton, I., Yarmarkovich, A., Pieper, S., Kikinis, R.,  
449 2011. Interactive diffusion tensor tractography visualization for neurosurgical planning.  
450 *Neurosurgery* 68, 496–505.

451 Grosprêtre, S., Ruffino, C., Lebon, F., 2016. Motor imagery and cortico-spinal excitability:  
452 a review. *European Journal of Sport Science* 16, 317–324.

453 Hannula, H., Ilmoniemi, R.J., 2017. Basic principles of navigated TMS. Springer  
454 International Publishing, Cham. pp. 3–29. doi:[10.1007/978-3-319-54918-7\\_1](https://doi.org/10.1007/978-3-319-54918-7_1).

455 Hernandez-Pavon, J.C., Schneider-Garces, N., Begnoche, J.P., Miller, L.E., Raij, T., 2022.  
456 Targeted modulation of human brain interregional effective connectivity with spike-  
457 timing dependent plasticity. *Neuromodulation: Technology at the Neural Interface*  
458 doi:<https://doi.org/10.1016/j.neurom.2022.10.045>.

459 Horn, A., Fox, M.D., 2020. Opportunities of connectomic neuromodulation. *NeuroImage*  
460 221, 117180. doi:<https://doi.org/10.1016/j.neuroimage.2020.117180>.

- 461 Irfanoglu, M.O., Walker, L., Sarlls, J., Marenco, S., Pierpaoli, C., 2012. Effects of image  
462 distortions originating from susceptibility variations and concomitant fields on diffusion  
463 MRI tractography results. *NeuroImage* 61, 275–288.
- 464 Jeurissen, B., Leemans, A., Tournier, J.D., Jones, D.K., Sijbers, J., 2013. Investigating the  
465 prevalence of complex fiber configurations in white matter tissue with diffusion magnetic  
466 resonance imaging. *Human Brain Mapping* 34, 2747–2766.
- 467 Koch, G., Cercignani, M., Pecchioli, C., Versace, V., Oliveri, M., Caltagirone, C., Rothwell,  
468 J., Bozzali, M., 2010. In vivo definition of parieto-motor connections involved in planning  
469 of grasping movements. *NeuroImage* 51, 300–312.
- 470 Koch, G., Ponzio, V., Di Lorenzo, F., Caltagirone, C., Veniero, D., 2013. Hebbian and  
471 anti-hebbian spike-timing-dependent plasticity of human cortico-cortical connections.  
472 *Journal of Neuroscience* 33, 9725–9733.
- 473 Koch, G., Rothwell, J.C., 2009. TMS investigations into the task-dependent functional  
474 interplay between human posterior parietal and motor cortex. *Behavioural Brain*  
475 *Research* 202, 147–152.
- 476 Korgaonkar, M.S., Fornito, A., Williams, L.M., Grieve, S.M., 2014. Abnormal structural  
477 networks characterize major depressive disorder: a connectome analysis. *Biological*  
478 *Psychiatry* 76, 567–574.
- 479 Krieg, S.M., Lioumis, P., Mäkelä, J.P., Wilenius, J., Karhu, J., Hannula, H., Savolainen,  
480 P., Lucas, C.W., Seidel, K., Laakso, A., et al., 2017. Protocol for motor and language

- 481 mapping by navigated TMS in patients and healthy volunteers; workshop report. *Acta*  
482 *Neurochirurgica* 159, 1187–1195.
- 483 Laakso, I., Hirata, A., Ugawa, Y., 2013. Effects of coil orientation on the electric field  
484 induced by TMS over the hand motor area. *Physics in Medicine & Biology* 59, 203.
- 485 Lefaucheur, J.P., André-Obadia, N., Antal, A., Ayache, S.S., Baeken, C., Benninger, D.H.,  
486 Cantello, R.M., Cincotta, M., de Carvalho, M., De Ridder, D., et al., 2014. Evidence-  
487 based guidelines on the therapeutic use of repetitive transcranial magnetic stimulation  
488 (rTMS). *Clinical Neurophysiology* 125, 2150–2206.
- 489 Lefaucheur, J.P., Picht, T., 2016. The value of preoperative functional cortical mapping  
490 using navigated TMS. *Neurophysiologie Clinique/Clinical Neurophysiology* 46, 125–133.
- 491 Lioumis, P., Kičić, D., Savolainen, P., Mäkelä, J.P., Kähkönen, S., 2009. Reproducibility  
492 of TMS-evoked EEG responses. *Human Brain Mapping* 30, 1387–1396.
- 493 Lioumis, P., Zhdanov, A., Mäkelä, N., Lehtinen, H., Wilenius, J., Neuvonen, T., Hannula,  
494 H., Deletis, V., Picht, T., Mäkelä, J.P., 2012. A novel approach for documenting naming  
495 errors induced by navigated transcranial magnetic stimulation. *Journal of Neuroscience*  
496 *Methods* 204, 349–354.
- 497 Llufriu, S., Martínez-Heras, E., Solana, E., Sola-Valls, N., Sepulveda, M., Blanco, Y.,  
498 Martínez-Lapiscina, E.H., Andorra, M., Villoslada, P., Prats-Galino, A., Saiz, A., 2017.  
499 Structural networks involved in attention and executive functions in multiple sclerosis.  
500 *NeuroImage: Clinical* 13, 288–296. doi:[10.1016/j.nicl.2016.11.026](https://doi.org/10.1016/j.nicl.2016.11.026).

- 501 Lo, C.Y., Wang, P.N., Chou, K.H., Wang, J., He, Y., Lin, C.P., 2010. Diffusion tensor  
502 tractography reveals abnormal topological organization in structural cortical networks  
503 in Alzheimer's disease. *Journal of Neuroscience* 30, 16876–16885.
- 504 Maffei, C., Girard, G., Schilling, K.G., Adluru, N., Aydogan, D.B., Hamamci, A., Yeh,  
505 F.C., Mancini, M., Wu, Y., Sarica, A., et al., 2020. The IronTract challenge: Validation  
506 and optimal tractography methods for the HCP diffusion acquisition scheme. *ISMRM,*  
507 *Virtual .*
- 508 Maffei, C., Girard, G., Schilling, K.G., Aydogan, D.B., Adluru, N., Zhylyka, A., Wu,  
509 Y., Mancini, M., Hamamci, A., Sarica, A., et al., 2022. Insights from the IronTract  
510 challenge: optimal methods for mapping brain pathways from multi-shell diffusion MRI.  
511 *NeuroImage* 257, 119327.
- 512 Maier-Hein, K.H., Neher, P.F., Houde, J.C., Côté, M.A., Garyfallidis, E., Zhong, J.,  
513 Chamberland, M., Yeh, F.C., Lin, Y.C., Ji, Q., et al., 2017. The challenge of mapping  
514 the human connectome based on diffusion tractography. *Nature Communications* 8,  
515 1–13. doi:[10.1038/s41467-017-01285-x](https://doi.org/10.1038/s41467-017-01285-x).
- 516 Mäkelä, T., Vitikainen, A.M., Laakso, A., Mäkelä, J.P., 2015. Integrating nTMS data  
517 into a radiology picture archiving system. *Journal of Digital Imaging* 28, 428–432.  
518 doi:[10.1007/s10278-015-9768-6](https://doi.org/10.1007/s10278-015-9768-6).
- 519 Nath, V., Schilling, K.G., Parvathaneni, P., Huo, Y., Blaber, J.A., Hainline, A.E.,  
520 Barakovic, M., Romascano, D., Rafael-Patino, J., Frigo, M., et al., 2020. Tractography



- 521 reproducibility challenge with empirical data (TraCED): The 2017 ISMRM diffusion  
522 study group challenge. *Journal of Magnetic Resonance Imaging* 51, 234–249.
- 523 Nieminen, J.O., Sinisalo, H., Souza, V.H., Malmi, M., Yuryev, M., Tervo, A.E., Stenroos,  
524 M., Milardovich, D., Korhonen, J.T., Koponen, L.M., Ilmoniemi, R.J., 2022. Multi-locus  
525 transcranial magnetic stimulation system for electronically targeted brain stimulation.  
526 *Brain Stimulation* 15, 116–124. doi:[10.1016/j.brs.2021.11.014](https://doi.org/10.1016/j.brs.2021.11.014).
- 527 Pelissolo, A., Harika-Germaneau, G., Rachid, F., Gaudeau-Bosma, C., Tanguy, M.L.,  
528 BenAdhira, R., Bouaziz, N., Popa, T., Wassouf, I., Saba, G., et al., 2016. Repetitive  
529 transcranial magnetic stimulation to supplementary motor area in refractory obsessive-  
530 compulsive disorder treatment: a sham-controlled trial. *International Journal of*  
531 *Neuropsychopharmacology* 19, pyw025.
- 532 Picht, T., Frey, D., Thieme, S., Kliesch, S., Vajkoczy, P., 2016. Presurgical navigated  
533 TMS motor cortex mapping improves outcome in glioblastoma surgery: a controlled  
534 observational study. *Journal of Neuro-Oncology* 126, 535–543. doi:[10.1007/  
535 s11060-015-1993-9](https://doi.org/10.1007/s11060-015-1993-9).
- 536 Reveley, C., Seth, A.K., Pierpaoli, C., Silva, A.C., Yu, D., Saunders, R.C., Leopold, D.A.,  
537 Ye, F.Q., 2015. Superficial white matter fiber systems impede detection of long-range  
538 cortical connections in diffusion MR tractography. *Proceedings of the National Academy*  
539 *of Sciences* 112, E2820–E2828.

- 540 Rubinov, M., Sporns, O., 2010. Complex network measures of brain connectivity: Uses  
541 and interpretations. *NeuroImage* 52, 1059–1069.
- 542 Ruohonen, J., Karhu, J., 2010. Navigated transcranial magnetic stimulation. *Clinical*  
543 *Neurophysiology* 40, 7–17.
- 544 Sarwar, T., Ramamohanarao, K., Zalesky, A., 2019. Mapping connectomes with diffusion  
545 MRI: deterministic or probabilistic tractography? *Magnetic Resonance in Medicine* 81,  
546 1368–1384.
- 547 Schilling, K.G., Nath, V., Hansen, C., Parvathaneni, P., Blaber, J., Gao, Y., Neher,  
548 P., Aydogan, D.B., Shi, Y., Ocampo-Pineda, M., et al., 2019. Limits to anatomical  
549 accuracy of diffusion tractography using modern approaches. *NeuroImage* 185, 1–11.  
550 doi:[10.1016/j.neuroimage.2018.10.029](https://doi.org/10.1016/j.neuroimage.2018.10.029).
- 551 Schilling, K.G., Rheault, F., Petit, L., Hansen, C.B., Nath, V., Yeh, F.C., Girard,  
552 G., Barakovic, M., Rafael-Patino, J., Yu, T., et al., 2021. Tractography dissection  
553 variability: What happens when 42 groups dissect 14 white matter bundles on the same  
554 dataset? *NeuroImage* 243, 118502.
- 555 Schilling, K.G., Tax, C.M., Rheault, F., Landman, B.A., Anderson, A.W., Descoteaux,  
556 M., Petit, L., 2022. Prevalence of white matter pathways coming into a single white  
557 matter voxel orientation: The bottleneck issue in tractography. *Human Brain Mapping*  
558 43, 1196–1213.

- 559 Shi, Y., Toga, A., 2017. Connectome imaging for mapping human brain pathways.  
560 *Molecular Psychiatry* 22, 1230–1240.
- 561 Siebner, H.R., Funke, K., Aberra, A.S., Antal, A., Bestmann, S., Chen, R., Classen, J.,  
562 Davare, M., Di Lazzaro, V., Fox, P.T., et al., 2022. Transcranial magnetic stimulation  
563 of the brain: What is stimulated?—a consensus and critical position paper. *Clinical*  
564 *Neurophysiology* .
- 565 Smith, R.E., Tournier, J.D., Calamante, F., Connelly, A., 2012. Anatomically-constrained  
566 tractography: improved diffusion MRI streamlines tractography through effective use  
567 of anatomical information. *NeuroImage* 62, 1924–1938.
- 568 Sollmann, N., Goblirsch-Kolb, M.F., Ille, S., Butenschoen, V.M., Boeckh-Behrens, T.,  
569 Meyer, B., Ringel, F., Krieg, S.M., 2016. Comparison between electric-field-navigated  
570 and line-navigated TMS for cortical motor mapping in patients with brain tumors. *Acta*  
571 *Neurochirurgica* 158, 2277–2289.
- 572 Souza, V.H., Matsuda, R.H., Peres, A.S., Amorim, P.H.J., Moraes, T.F., Silva, J.V.L.,  
573 Baffa, O., 2018. Development and characterization of the InVesalius Navigator software  
574 for navigated transcranial magnetic stimulation. *Journal of Neuroscience Methods* 309,  
575 109–120.
- 576 Souza, V.H., Nieminen, J.O., Tugin, S., Koponen, L.M., Baffa, O., Ilmoniemi, R.J., 2022.  
577 TMS with fast and accurate electronic control: Measuring the orientation sensitivity

- 578 of corticomotor pathways. *Brain Stimulation* 15, 306–315. doi:[https://doi.org/10.](https://doi.org/10.1016/j.brs.2022.01.009)  
579 [1016/j.brs.2022.01.009](https://doi.org/10.1016/j.brs.2022.01.009).
- 580 Terao, Y., Ugawa, Y., 2002. Basic mechanisms of TMS. *Journal of Clinical*  
581 *Neurophysiology* 19, 322.
- 582 Tervo, A.E., Nieminen, J.O., Lioumis, P., Metsomaa, J., Souza, V.H., Sinisalo, H.,  
583 Stenroos, M., Sarvas, J., Ilmoniemi, R.J., 2022. Closed-loop optimization of transcranial  
584 magnetic stimulation with electroencephalography feedback. *Brain Stimulation* 15, 523–  
585 531. doi:<https://doi.org/10.1016/j.brs.2022.01.016>.
- 586 Thomas, C., Ye, F.Q., Irfanoglu, M.O., Modi, P., Saleem, K.S., Leopold, D.A., Pierpaoli,  
587 C., 2014. Anatomical accuracy of brain connections derived from diffusion MRI  
588 tractography is inherently limited. *Proceedings of the National Academy of Sciences*  
589 111, 16574–16579.
- 590 Tran, G., Shi, Y., 2015. Fiber orientation and compartment parameter estimation from  
591 multi-shell diffusion imaging. *IEEE Transactions on Medical Imaging* 34, 2320–2332.
- 592 Tremblay, S., Rogasch, N.C., Premoli, I., Blumberger, D.M., Casarotto, S., Chen, R.,  
593 Di Lazzaro, V., Farzan, F., Ferrarelli, F., Fitzgerald, P.B., et al., 2019. Clinical utility  
594 and prospective of TMS-EEG. *Clinical Neurophysiology* 130, 802–844.
- 595 Van Essen, D.C., 2013. Cartography and connectomes. *Neuron* 80, 775–790. doi:[10.1016/](https://doi.org/10.1016/j.neuron.2013.10.027)  
596 [j.neuron.2013.10.027](https://doi.org/10.1016/j.neuron.2013.10.027).

- 597 Veraart, J., Novikov, D.S., Christiaens, D., Ades-aron, B., Sijbers, J., Fieremans, E.,  
598 2016. Denoising of diffusion MRI using random matrix theory. *NeuroImage* 142, 394–  
599 406. doi:[10.1016/j.neuroimage.2016.08.016](https://doi.org/10.1016/j.neuroimage.2016.08.016).
- 600 Wandell, B.A., 2016. Clarifying human white matter. *Annual Review of Neuroscience* 39,  
601 103–128.
- 602 Weise, K., Numssen, O., Thielscher, A., Hartwigsen, G., Knösche, T.R., 2020. A novel  
603 approach to localize cortical tms effects. *NeuroImage* 209, 116486. doi:[https://doi.](https://doi.org/10.1016/j.neuroimage.2019.116486)  
604 [org/10.1016/j.neuroimage.2019.116486](https://doi.org/10.1016/j.neuroimage.2019.116486).
- 605 Yamada, K., Ito, H., Nakamura, H., Kizu, O., Akada, W., Kubota, T., Goto, M., Konishi,  
606 J., Yoshikawa, K., Shiga, K., Nakagawa, M., Mori, S., Nishimura, T., 2004. Stroke  
607 patients' evolving symptoms assessed by tractography. *Journal of Magnetic Resonance*  
608 *Imaging* 20, 923–929. doi:[10.1002/jmri.20215](https://doi.org/10.1002/jmri.20215).
- 609 Yendiki, A., Aggarwal, M., Axer, M., Howard, A.F., van Cappellen van Walsum,  
610 A.M., Haber, S.N., 2022. Post mortem mapping of connectional anatomy for the  
611 validation of diffusion MRI. *NeuroImage* 256, 119146. doi:[https://doi.org/10.1016/](https://doi.org/10.1016/j.neuroimage.2022.119146)  
612 [j.neuroimage.2022.119146](https://doi.org/10.1016/j.neuroimage.2022.119146).
